# Supplementary material
Source: PubMed Central journal article supplement (PMC7772264)
Supplement: NIHMS1615622-supplement-1.pdf [file NIHMS1615622-supplement-1.pdf]

**Table E1. Characteristics of study participants by diagnostic group \***

|                                    | AD+PA+<br>N=9     | AD-PA+<br>N=13    | NA<br>N=11     | p-value |
|------------------------------------|-------------------|-------------------|----------------|---------|
| <i>Demographics</i>                |                   |                   |                |         |
| Gender: Female                     | 3 (33.3%)         | 3 (23.1%)         | 8 (72.7%)      | 0.04    |
| Male                               | 6 (66.7%)         | 10 (76.9%)        | 3 (28.3%)      |         |
| Race: White                        | 7 (81.0%)         | 13 (100%)         | 11 (100%)      | 0.06    |
| African-American                   | 2 (19.0%)         | 0 (0%)            | 0 (0%)         |         |
| Age (yrs.)                         | 15 [11.5; 17.0]   | 10 [6.0; 14.0]    | 11 [9.0; 16.0] | 0.09    |
| Age Group: <12 yrs.                | 2 (22.2%)         | 8 (61.5%)         | 6 (54.5%)      | 0.17    |
| ≥12 yrs.                           | 7 (78.8%)         | 5 (39.5%)         | 5 (45.5%)      |         |
| <i>Clinical</i>                    |                   |                   |                |         |
| SCORing Atopic Dermatitis (SCORAD) | 22.3 [11.1; 26.3] |                   |                |         |
| SCORAD: Mild (<20)                 | 3 (33%)           |                   |                |         |
| Moderate (20-40)                   | 5 (56%)           |                   |                |         |
| Severe (>40)                       | 1 (11%)           |                   |                |         |
| Peanut IgE (kU/L)                  | 4.6 [1.6; 21.4]   | 21.5 [3.4; 100]   |                | 0.29    |
| Peanut Wheal Size (mm):            | 15.0 [10.0; 15.0] | 21.5 [14.5; 33.0] | 0.0 [0.0; 0.0] | <0.0001 |

\* Medians [1<sup>st</sup>, 3<sup>rd</sup> quartile] are used for continuous variables and numbers (percents) for categorical variables. P-values for comparisons between diagnostic groups were calculated with the use of the Kruskal-Wallis test by ranks or Mann-Whitney test for continuous variables and the chi-square test for categorical variables.
